# Supplementary material for: A Y-chromosome shredding gene drive for controlling pest vertebrate populations
Source: eLife journal article supplement (doi:10.7554/elife.41873), 2019-02-15
Supplement: supp [file elife-41873-supp-v1.zip]

Archive with 5 entries (5 files):
- elife_poa_e41873_Figure_1_source_data_1.csv
- elife_poa_e41873_Supplementary_File_1.docx
- elife_poa_e41873_Transparent_Reporting_File.pdf
- elife_poa_e41873_Source_code_1.r
- elife_poa_e41873_Figure_7_figure_supplement_1.pdf
