# Supplementary material for: A Y-chromosome shredding gene drive for controlling pest vertebrate populations
Source: eLife journal article supplement (doi:10.7554/elife.41873), 2019-02-15
Supplement: supp [file elife-41873-supp-v1.zip › elife_poa_e41873_Figure_1_source_data_1.csv]

Group	EV	Centro 37X-A	Centro 37X-B	Centro 59X	Long Arm 225X	Long Arm 243X	Long Arm 256X
1	1	0.118	0.295	0.405	0.73	0.685	0.555
1	1	0.146	0.298	0.486	0.689	0.68	0.56
1	1	0.119	0.356	0.478	0.844	0.639	0.582
2	1	0.112	0.253	0.265	0.307	0.375	0.218
2	1	0.114	0.246	0.286	0.319	0.383	0.235
2	1	0.119	0.239	0.393	0.706	0.415	0.266
