# Supplementary figures and images for: A Y-chromosome shredding gene drive for controlling pest vertebrate populations
Source: eLife journal article supplement (doi:10.7554/elife.41873), 2019-02-15

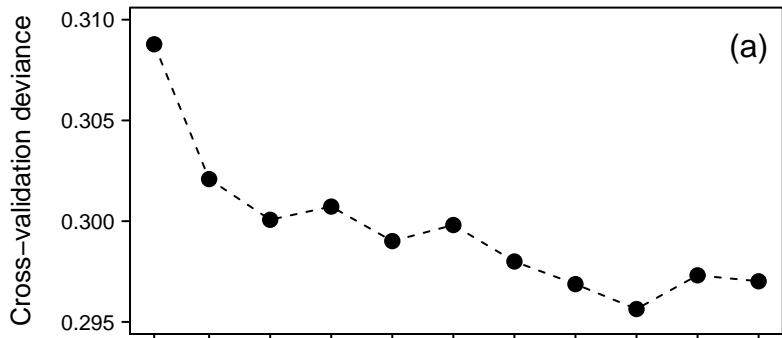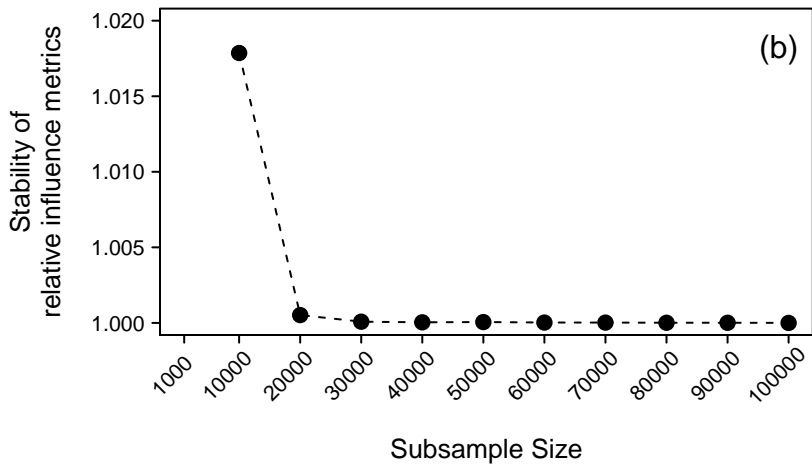

Supplement: supp [file elife-41873-supp-v1.zip]
